# Supplementary material for: Inorganometallic allenes [(Mn(η5-C5H5)(CO)2)2(μ-E)] (E = Si–Pb): bis-allylic anionic delocalisation similar to organometallic allene but differential σ-donation and π-backdonation
Source: Royal Society of Chemistry journal article supplement (doi:10.1039/d3cp03211f), 2023-01-01
Supplement: d3cp03211f1.pdf [file d3cp03211f1.pdf]

## Supporting Information

### **Inorganometallic Allenes [(Mn( $\eta^5$ -C<sub>5</sub>H<sub>5</sub>)(CO)<sub>2</sub>)<sub>2</sub>( $\mu$ -E)] (E = Si – Pb): Bis Allylic Anionic Delocalisation Similar to Organometallic Allene but Differential $\sigma$ -Donation and $\pi$ -Backdonation**

Parameswaran Parvathy and Pattiyil Parameswaran  
Department of Chemistry  
National Institute of Technology Calicut, Kerala, India-673601  
param@nitc.ac.in

#### Table of Contents

|                                                                                     |    |
|-------------------------------------------------------------------------------------|----|
| Equilibrium geometry of <b>1E</b>                                                   | 1  |
| Rigid potential energy scan of <b>2E</b>                                            | 1  |
| MOs of <b>2Ge</b> , <b>2Sn</b> and <b>2Pb</b>                                       | 2  |
| NBO details                                                                         | 3  |
| Schematic representation of bonding possibilities for EDA                           | 4  |
| Results of EDA-NOCV analysis                                                        | 5  |
| Detailed EDA-NOCV results for possibilities D and E                                 | 7  |
| Detailed EDA-NOCV results for possibilities M                                       | 8  |
| Graphical plot for $\Delta E_{\text{prep}}$ for bonding possibilities A, B, D, E, M | 9  |
| Note on the details of EDA possibilities D, E, and M                                | 10 |
| Plots of Deformation densities and NOCV orbitals                                    | 11 |
| Cartesian coordinates                                                               | 19 |

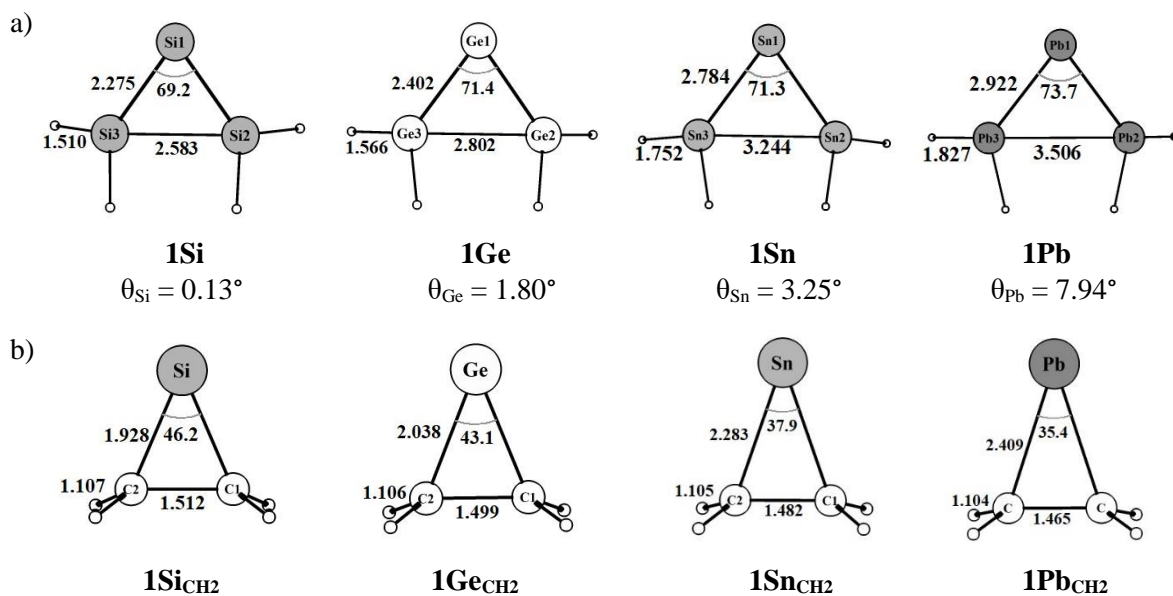

**Figure S1:** Optimised geometries of heavy allenes a) **1E** and b) **1E<sub>CH2</sub>** (E = Si-Pb) at BP86/def2-SVP level of theory; Given below is the pyramidalization angle ( $\theta_E = 360$ -sum of angles around E) at the terminal E atom for **1E**.

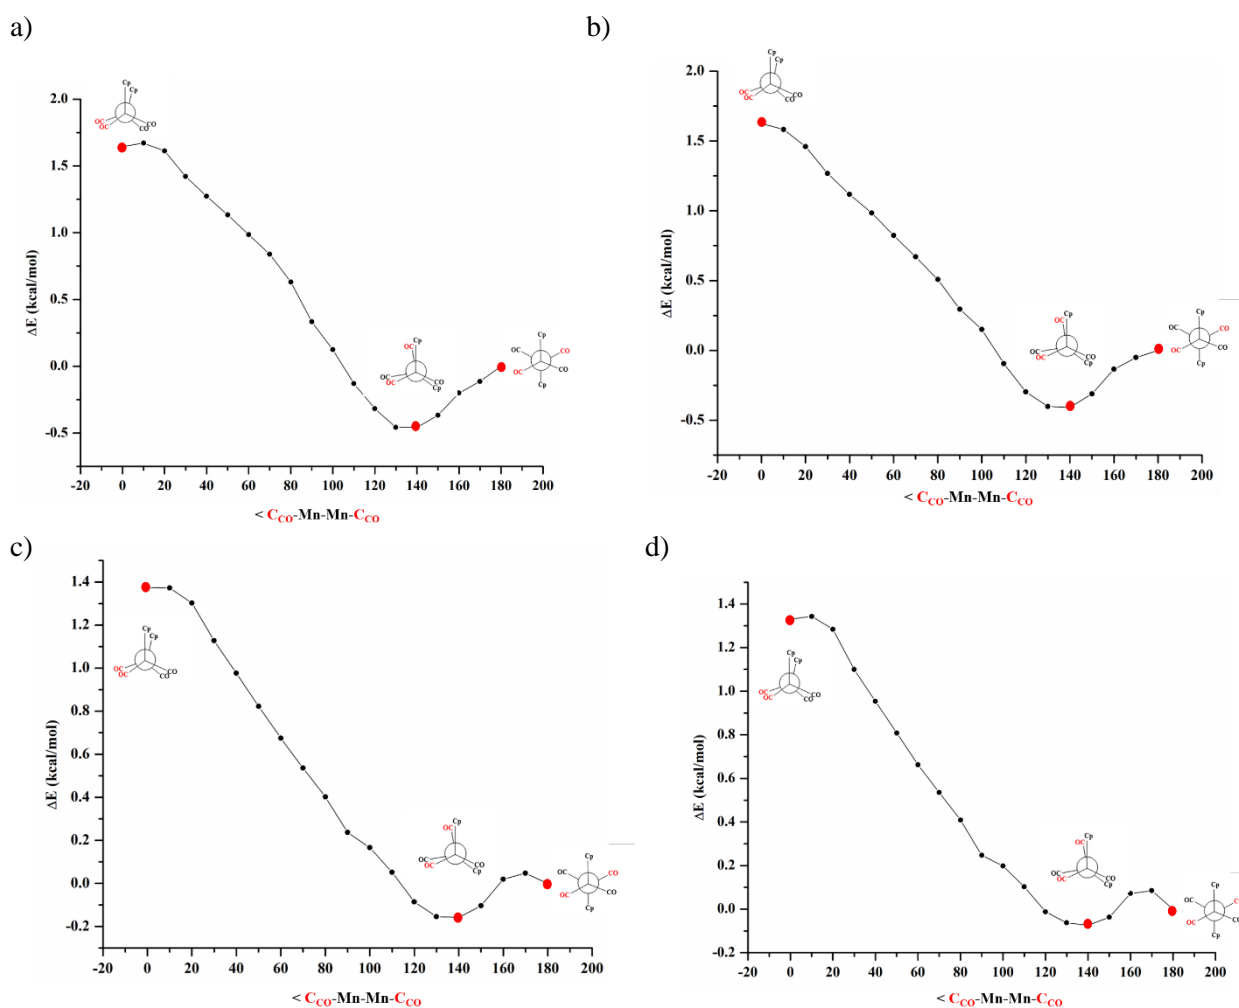

**Figure S2:** Rigid potential energy scan of **2Si** (a), **2Ge** (b), **2Sn** (c) and **2Pb** (d) by changing the  $\text{C}_{\text{co}}\text{-Mn-Mn-C}_{\text{co}}$  dihedral angle by  $10^\circ$  from  $180^\circ$  to  $0^\circ$ . Selected points are highlighted in red.

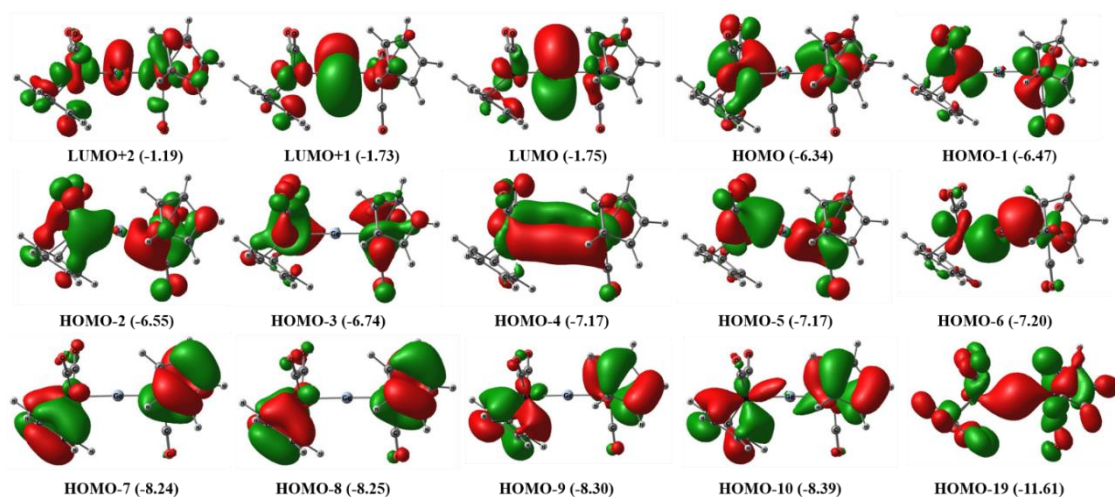

**Figure S3:** Selected frontier MOs of **2Ge** at M06/def2-TZVPP//BP86/def2-SVP level of theory; Eigen values given in eV in parentheses; Isosurface value 0.03

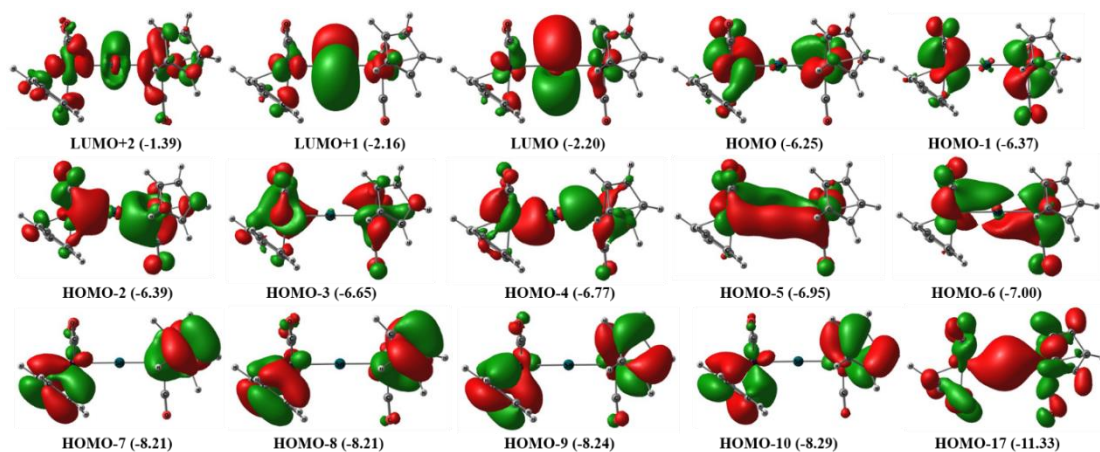

**Figure S4:** Selected frontier MOs of **2Sn** at M06/def2-TZVPP//BP86/def2-SVP level of theory; Eigen values given in eV in parentheses; Isosurface value 0.03

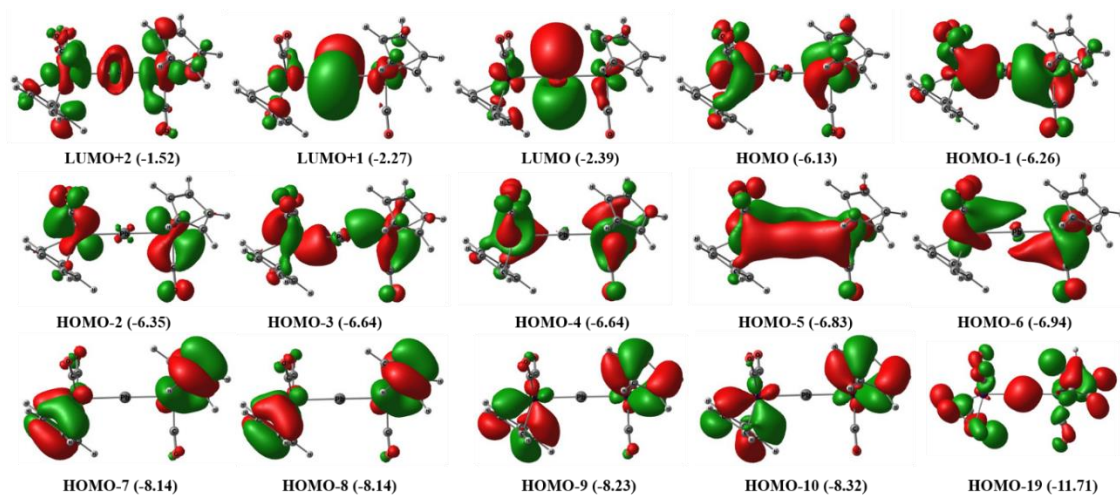

**Figure S5:** Selected frontier MOs of **2Pb** at M06/def2-TZVPP//BP86/def2-SVP level of theory; Eigen values given in eV in parentheses; Isosurface value 0.03

**Table S1:** Bond orbital occupancy (BO) from the NBO analysis of **1E** at M06/def2-TZVPP//BP86/def2-SVP level of theory.

| <b>Compound</b> | <b>Bond</b>     | <b>BO</b>                   |
|-----------------|-----------------|-----------------------------|
| <b>2Si</b>      | Si-Mn1          | 1.84 (28.78% Si; 71.22% Mn) |
|                 |                 | 1.67 (95.55% Mn; 4.45% Si)  |
|                 | Mn2-C1          | 1.95 (45.30% Mn; 54.70% C)  |
|                 | Mn2-C2          | 1.95 (46.16% Mn; 53.84% C)  |
|                 | C1-O1           | 2.00 (25.54% C; 74.46% O)   |
|                 |                 | 1.99 (25.48% C; 74.52% O)   |
|                 |                 | 1.99 (27.11% C; 72.89% O)   |
|                 | LP(1) Mn1       | 1.61 (97.52% d)             |
|                 | LP(2) Mn1       | 1.43 (73.46% d)             |
|                 | LP(1) Mn2       | 1.61 (97.52% d)             |
| LP(2) Mn2       | 1.43 (73.46% d) |                             |
| <b>2Ge</b>      | Ge-Mn1          | 1.86 (34.27% Ge; 65.73% Mn) |
|                 |                 | 1.70 (6.40% Ge; 93.60% Mn)  |
|                 | Mn2-C1          | 1.96 (44.56% Mn; 55.44% C)  |
|                 | Mn2-C2          | 1.96 (45.01% Mn; 54.99% C)  |
|                 | C1-O1           | 1.99 (27.62% C; 72.38% O)   |
|                 |                 | 2.00 (23.46% C; 76.54% O)   |
|                 |                 | 1.99 (26.70% C; 73.30% O)   |
|                 | LP(1) Mn1       | 1.61 (97.78% d)             |
|                 | LP(2) Mn1       | 1.44 (74.92% d)             |
|                 | LP(1) Mn2       | 1.61 (97.78% d)             |
| LP(2) Mn2       | 1.44 (74.92% d) |                             |
| <b>2Sn</b>      | Sn-Mn1          | 1.83 (33.09% Sn; 66.91% Mn) |
|                 |                 | 1.70 (5.67% Sn; 94.33% Mn)  |
|                 | Mn2-C1          | 1.96 (43.59% Mn; 56.41% C)  |
|                 | Mn2-C2          | 1.96 (44.02% Mn; 55.98% C)  |
|                 | C1-O1           | 1.99 (26.81% C; 73.19% O)   |
|                 |                 | 2.00 (23.12% C; 76.88% O)   |
|                 |                 | 1.99 (27.84% C; 72.16% O)   |
|                 | LP(1) Mn1       | 1.60 (97.42% d)             |
|                 | LP(2) Mn1       | 1.44 (74.80% d)             |
|                 | LP(1) Mn2       | 1.60 (97.42% d)             |
| LP(2) Mn2       | 1.44 (74.80% d) |                             |
| <b>2Pb</b>      | Pb-Mn1          | 1.79 (37.80% Pb; 62.20% Mn) |
|                 |                 | 1.69 (3.92% Pb; 96.08% Mn)  |
|                 | Mn2-C1          | 1.96 (43.22% Mn; 56.78% C)  |
|                 | Mn2-C2          | 1.96 (43.58% Mn; 56.42% C)  |
|                 | C1-O1           | 1.99 (27.16% C; 72.84% O)   |
|                 |                 | 2.00 (23.27% C; 76.73% O)   |
|                 |                 | 1.99 (27.37% C; 72.63% O)   |
|                 | LP(1) Mn1       | 1.60 (97.34% d)             |
|                 | LP(2) Mn1       | 1.46 (77.16% d)             |
|                 | LP(1) Mn2       | 1.60 (97.34% d)             |
| LP(2) Mn2       | 1.46 (77.16% d) |                             |

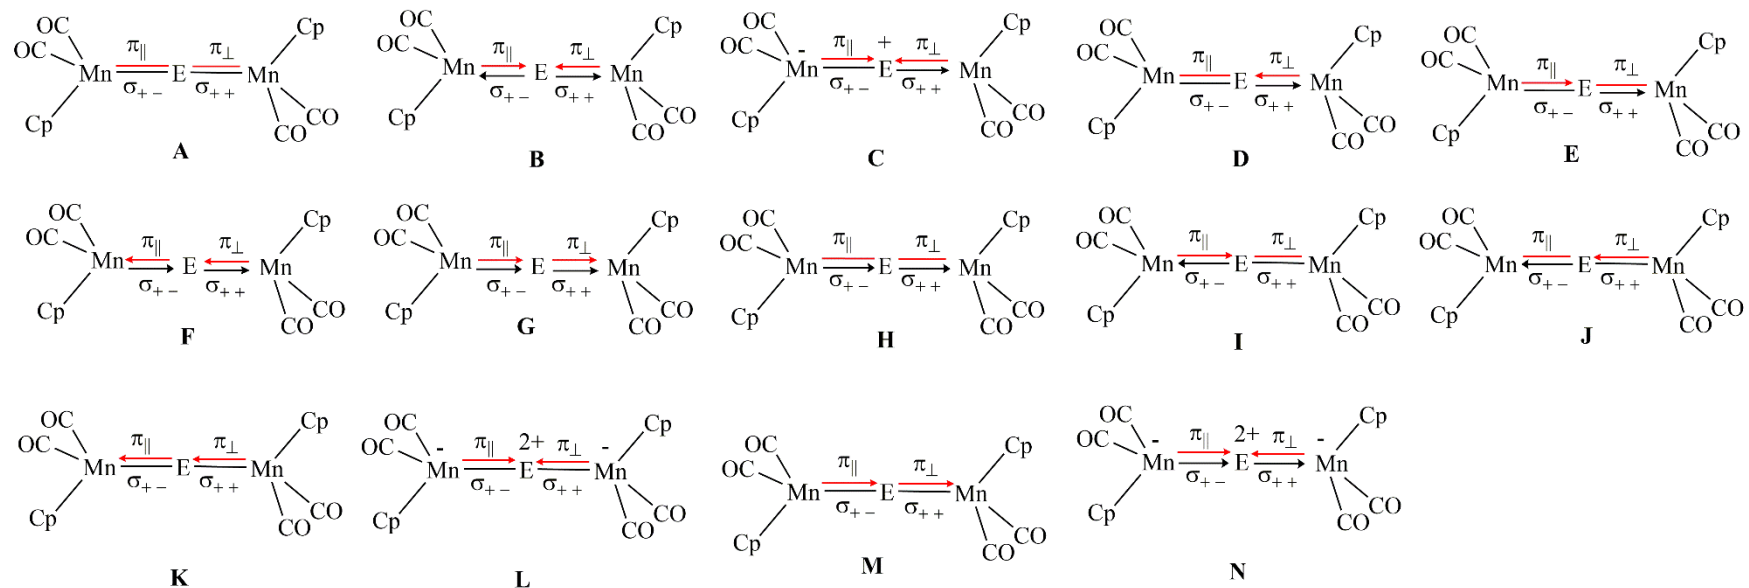

**Scheme S1:** Various bonding possibilities considered for the EDA-NOCV analysis of **2E** (E = C – Pb) at BP86/TZ2P level of theory; **2E** is fragmented in to E and (MnCp(CO)<sub>2</sub>)<sub>2</sub>; Straight lines depict electron sharing interactions, arrows depict donor-acceptor interactions; Red lines represent π-skeleton and black lines represent σ-skeleton; Bonding possibilities in the squares have the lowest ΔE<sub>orb</sub> values and are considered for detailed analysis.

**Table S2:** Results of EDA-NOCV analysis carried out for bonding possibilities A-M for compound **2E** at BP86/TZ2P level of theory;

| Compound   | Possibility          | $\Delta E_{\text{int}}$ | $\Delta E_{\text{elect}}$ | $\Delta E_{\text{Pauli}}$ | $\Delta E_{\text{orb}}$ | $\Delta E_{\text{disp}}$ |
|------------|----------------------|-------------------------|---------------------------|---------------------------|-------------------------|--------------------------|
| <b>2C</b>  | <b>A</b>             | -344.56                 | -282.32                   | 314.28                    | -369.60                 | -6.92                    |
|            | <b>B</b>             | -264.96                 | -457.08                   | 512.19                    | -313.15                 | -6.92                    |
|            | <b>C</b>             | -453.74                 | -239.97                   | 297.95                    | -504.79                 | -6.92                    |
|            | <b>D</b>             | -255.25                 | -286.28                   | 397.54                    | -359.58                 | -6.92                    |
|            | <b>E</b>             | -252.24                 | -303.29                   | 420.48                    | -362.51                 | -6.92                    |
|            | <b>F</b>             | -367.28                 | -67.45                    | 176.83                    | -469.74                 | -6.92                    |
|            | <b>G</b>             | -362.08                 | -71.23                    | 147.80                    | -431.72                 | -6.92                    |
|            | <b>H</b>             | -303.56                 | -134.53                   | 286.13                    | -448.24                 | -6.92                    |
|            | <b>I</b>             | -403.28                 | -521.89                   | 516.52                    | -390.98                 | -6.92                    |
|            | <b>J</b>             | -406.77                 | -528.99                   | 543.69                    | -414.54                 | -6.92                    |
|            | <b>K</b>             | -454.23                 | -288.97                   | 335.72                    | -494.05                 | -6.92                    |
|            | <b>L</b>             | -1185.04                | -473.46                   | 160.83                    | -865.48                 | -6.92                    |
|            | <b>M</b>             | -654.40                 | -276.14                   | 322.08                    | -693.41                 | -6.92                    |
|            | <b>N</b>             | -1106.13                | -274.99                   | 95.24                     | -919.47                 | -6.92                    |
| <b>2Si</b> | <b>A</b>             | -295.69                 | -295.06                   | 327.48                    | -313.85                 | -14.26                   |
|            | <b>B</b>             | -204.28                 | -436.40                   | 482.02                    | -235.64                 | -14.26                   |
|            | <b>C</b>             | -321.06                 | -260.04                   | 226.55                    | -273.30                 | -14.26                   |
|            | <b>D</b>             | -202.14                 | -269.53                   | 334.58                    | -252.93                 | -14.26                   |
|            | <b>E</b>             | -198.02                 | -263.30                   | 319.53                    | -239.99                 | -14.26                   |
|            | <b>F</b>             | -285.13                 | -91.31                    | 160.89                    | -340.46                 | -14.26                   |
|            | <b>G<sup>a</sup></b> |                         |                           |                           |                         |                          |
|            | <b>H</b>             | -238.93                 | -85.62                    | 154.60                    | -293.66                 | -14.26                   |
|            | <b>I<sup>a</sup></b> |                         |                           |                           |                         |                          |
|            | <b>J</b>             | -337.80                 | -500.67                   | 515.07                    | -337.94                 | -14.26                   |
|            | <b>K</b>             | -376.44                 | -307.37                   | 342.00                    | -396.81                 | -14.26                   |
|            | <b>L</b>             | -874.94                 | -548.47                   | 192.09                    | -504.30                 | -14.26                   |
|            | <b>M<sup>a</sup></b> |                         |                           |                           |                         |                          |
|            | <b>N</b>             | -762.91                 | -358.21                   | 65.05                     | -455.49                 | -14.26                   |
| <b>2Ge</b> | <b>A</b>             | -314.40                 | -292.06                   | 309.12                    | -317.25                 | -14.21                   |
|            | <b>B</b>             | -189.24                 | -386.57                   | 417.10                    | -205.57                 | -14.21                   |
|            | <b>C</b>             | -301.84                 | -242.60                   | 190.97                    | -236.01                 | -14.21                   |
|            | <b>D</b>             | -188.57                 | -237.15                   | 281.50                    | -218.72                 | -14.21                   |
|            | <b>E</b>             | -182.94                 | -234.46                   | 273.55                    | -207.83                 | -14.21                   |
|            | <b>F</b>             | -269.54                 | -76.40                    | 128.29                    | -307.23                 | -14.21                   |
|            | <b>G<sup>a</sup></b> |                         |                           |                           |                         |                          |
|            | <b>H</b>             | -223.01                 | -72.48                    | 119.81                    | -256.14                 | -14.21                   |
|            | <b>I</b>             | -349.66                 | -470.17                   | 460.14                    | -325.43                 | -14.21                   |
|            | <b>J</b>             | -355.93                 | -469.96                   | 466.79                    | -338.56                 | -14.21                   |
|            | <b>K</b>             | -393.34                 | -304.30                   | 320.94                    | -395.78                 | -14.21                   |
|            | <b>L</b>             | -884.44                 | -561.97                   | 192.18                    | -500.44                 | -14.21                   |
|            | <b>M<sup>a</sup></b> |                         |                           |                           |                         |                          |
|            | <b>N</b>             | -729.18                 | -359.84                   | 50.59                     | -405.72                 | -14.21                   |
| <b>2Sn</b> | <b>A</b>             | -284.19                 | -279.11                   | 293.69                    | -282.74                 | -16.03                   |

|            |                      |         |         |        |         |        |
|------------|----------------------|---------|---------|--------|---------|--------|
|            | <b>B</b>             | -169.47 | -356.97 | 385.25 | -181.73 | -16.03 |
|            | <b>C</b>             | -268.59 | -236.59 | 176.68 | -192.65 | -16.03 |
|            | <b>D</b>             | -170.01 | -217.21 | 253.07 | -189.84 | -16.03 |
|            | <b>E</b>             | -163.68 | -215.00 | 246.38 | -179.02 | -16.03 |
|            | <b>F</b>             | -245.83 | -80.25  | 119.91 | -269.44 | -16.03 |
|            | <b>G</b>             | -233.08 | -78.17  | 104.34 | -243.22 | -16.03 |
|            | <b>H</b>             | -201.45 | -77.64  | 110.78 | -218.56 | -16.03 |
|            | <b>I</b>             | -314.50 | -439.07 | 433.58 | -292.98 | -16.03 |
|            | <b>J</b>             | -321.31 | -437.18 | 436.90 | -304.99 | -16.03 |
|            | <b>K</b>             | -356.50 | -286.55 | 301.20 | -355.13 | -16.03 |
|            | <b>L</b>             | -796.05 | -561.00 | 196.09 | -415.10 | -16.03 |
|            | <b>M<sup>a</sup></b> |         |         |        |         |        |
|            | <b>N</b>             | -656.01 | -377.05 | 55.53  | -318.45 | -16.03 |
| <b>2Pb</b> | <b>A</b>             | -318.53 | -270.06 | 280.19 | -311.91 | -16.75 |
|            | <b>B</b>             | -156.73 | -336.75 | 364.25 | -167.48 | -16.75 |
|            | <b>C</b>             | -247.85 | -224.28 | 166.75 | -173.56 | -16.75 |
|            | <b>D</b>             | -157.93 | -202.50 | 236.11 | -174.79 | -16.75 |
|            | <b>E</b>             | -152.53 | -197.50 | 225.09 | -163.37 | -16.75 |
|            | <b>F</b>             | -232.06 | -74.96  | 112.96 | -253.31 | -16.75 |
|            | <b>G<sup>a</sup></b> |         |         |        |         |        |
|            | <b>H</b>             | -190.02 | -68.10  | 96.32  | -201.49 | -16.75 |
|            | <b>I</b>             | -346.65 | -420.99 | 413.47 | -322.38 | -16.75 |
|            | <b>J</b>             | -352.46 | -420.75 | 419.34 | -334.30 | -16.75 |
|            | <b>K</b>             | -388.03 | -275.43 | 289.17 | -385.02 | -16.75 |
|            | <b>L</b>             | -810.43 | -354.92 | 201.47 | -438.77 | -16.75 |
|            | <b>M<sup>a</sup></b> |         |         |        |         |        |
|            | <b>N</b>             | -619.44 | -374.46 | 60.57  | -288.80 | -16.75 |

<sup>a</sup> Calculations did not converge to correct electronic states while preparing the fragments for the EDA-NOCV calculations; These possibilities are found to have high negative values of  $\Delta E_{\text{orb}}$  for **2C**.

**Table S3:** Detailed results of EDA-NOCV analysis for bonding possibilities D and E of compounds **2E** (E = Si-Pb) at BP86/TZ2P level of theory.

|                                         | <b>2Si</b>          |                     | <b>2Ge</b>          |                     | <b>2Sn</b>          |                     | <b>2Pb</b>          |                     |
|-----------------------------------------|---------------------|---------------------|---------------------|---------------------|---------------------|---------------------|---------------------|---------------------|
|                                         | D                   | E                   | D                   | E                   | D                   | E                   | D                   | E                   |
| $\Delta E_{\text{int}}$                 | -202.14             | -198.02             | -188.57             | -182.94             | -170.01             | -163.68             | -157.93             | -152.53             |
| $\Delta E_{\text{elect}}^{\text{a}}$    | -269.53<br>(51.59%) | -263.30<br>(52.32%) | -237.15<br>(52.02%) | -234.46<br>(53.01%) | -217.21<br>(53.36%) | -215.00<br>(54.55%) | -202.50<br>(53.67%) | -197.50<br>(54.73%) |
| $\Delta E_{\text{Pauli}}$               | 334.58              | 319.53              | 281.5               | 273.55              | 253.07              | 246.38              | 236.11              | 225.09              |
| $\Delta E_{\text{orb}}^{\text{a}}$      | -252.93<br>(48.41%) | -239.99<br>(47.68%) | -218.72<br>(47.98%) | -207.83<br>(46.99%) | -189.84<br>(46.64%) | -179.02<br>(45.43%) | -174.79<br>(46.33%) | -163.37<br>(45.27%) |
| $\Delta E_{\sigma^{++}}^{\text{b}}$     | -29.40<br>(11.62%)  | -30.43<br>(12.68%)  | -23.58<br>(10.78%)  | -22.33<br>(10.74%)  | -20.61<br>(10.86%)  | -20.02<br>(11.18%)  | -14.29<br>(8.17%)   | -14.07<br>(8.61%)   |
| $\Delta E_{\sigma^{+-}}^{\text{b}}$     | -84.56<br>(33.43%)  | -85.15<br>(35.48%)  | -79.01<br>(36.12%)  | -79.30<br>(38.16%)  | -70.08<br>(36.92%)  | -70.24<br>(39.23%)  | -70.19<br>(40.16%)  | -70.57<br>(43.19%)  |
| $\Delta E_{\pi_{\perp}}^{\text{b}}$     | -45.71<br>(18.07%)  | -68.64<br>(28.60%)  | -35.22<br>(16.10%)  | -62.23<br>(29.94%)  | -26.14<br>(13.77%)  | -54.63<br>(30.52%)  | -23.39<br>(13.38%)  | -50.97<br>(31.20%)  |
| $\Delta E_{\pi_{\parallel}}^{\text{b}}$ | -72.55<br>(28.69%)  | -35.61<br>(14.84%)  | -68.95<br>(31.52%)  | -32.55<br>(15.66%)  | -62.91<br>(33.14%)  | -24.54<br>(13.71%)  | -58.66<br>(33.56%)  | -20.00<br>(12.24%)  |
| $\Delta E_{\text{rest}}^{\text{c}}$     | -20.77<br>(8.21%)   | -20.21<br>(8.42%)   | -12.02<br>(5.50%)   | -11.47<br>(5.52%)   | -10.13<br>(5.33%)   | -9.63<br>(5.38%)    | -8.31<br>(4.76%)    | -7.82<br>(4.79%)    |
| $\Delta E_{\text{prep}}$                | 16.75               | 12.63               | 18.76               | 13.13               | 18.61               | 12.28               | 16.94               | 11.54               |
| $-\mathbf{D}_e$                         | -185.39             | -185.39             | -169.81             | -169.81             | -151.4              | -151.40             | -140.99             | -140.99             |

<sup>a</sup> values in parentheses give the percentage contribution to attractive interactions  $\Delta E_{\text{orb}} + \Delta E_{\text{elect}}$ ; <sup>b</sup> values in parentheses give the percentage contribution to the orbital interaction,  $\Delta E_{\text{orb}}$ ; <sup>c</sup>  $\Delta E_{\text{rest}} = \Delta E_{\text{orb}} - (\Delta E_{\sigma^{++}} + \Delta E_{\sigma^{+-}} + \Delta E_{\pi_{\perp}} + \Delta E_{\pi_{\parallel}})$ .



**Table S4:** Detailed results of EDA-NOCV analysis for bonding possibility C of compounds **2E** (E = Si-Pb) at BP86/TZ2P level of theory;

|                                         | <b>2Si</b>          | <b>2Ge</b>          | <b>2Sn</b>          | <b>2Pb</b>          |
|-----------------------------------------|---------------------|---------------------|---------------------|---------------------|
| $\Delta E_{\text{int}}$                 | -321.06             | -301.84             | -268.59             | -247.85             |
| $\Delta E_{\text{elect}}^{\text{a}}$    | -260.04<br>(48.76%) | -242.6<br>(50.69%)  | -236.59<br>(55.12%) | -224.28<br>(56.37%) |
| $\Delta E_{\text{Pauli}}$               | 226.55              | 190.97              | 176.68              | 166.75              |
| $\Delta E_{\text{orb}}^{\text{a}}$      | -273.30<br>(51.24%) | -236.01<br>(49.31%) | -192.65<br>(44.88%) | -173.56<br>(43.63%) |
| $\Delta E_{\sigma^{++}}^{\text{b}}$     | -29.52<br>(10.80%)  | -21.04<br>(8.91%)   | -18.30<br>(9.50%)   | -13.21<br>(7.61%)   |
| $\Delta E_{\sigma^{+-}}^{\text{b}}$     | -91.64<br>(33.53%)  | -86.69<br>(36.73%)  | -75.44<br>(39.16%)  | -74.77<br>(43.08%)  |
| $\Delta E_{\pi_{\perp}}^{\text{b}}$     | -58.99<br>(21.58%)  | -51.59<br>(21.86%)  | -38.82<br>(20.15%)  | -35.87<br>(20.67%)  |
| $\Delta E_{\pi_{\parallel}}^{\text{b}}$ | -50.74<br>(18.57%)  | -46.74<br>(19.80%)  | -35.39<br>(18.37%)  | -29.37<br>(16.92%)  |
| $\Delta E_{\text{rest}}^{\text{c}}$     | -42.41<br>(15.52%)  | -29.93<br>(12.68%)  | -24.65<br>(12.80%)  | -20.32<br>(11.71%)  |
| $\Delta E_{\text{prep}}$                | 135.67              | 132.03              | 117.19              | 106.86              |
| <b>-D<sub>e</sub></b>                   | -185.39             | -169.81             | -151.4              | -140.99             |

<sup>a</sup> values in parentheses give the percentage contribution to attractive interactions  $\Delta E_{\text{orb}} + \Delta E_{\text{elect}}$ ; <sup>b</sup> values in parentheses give the percentage contribution to the orbital interaction,  $\Delta E_{\text{orb}}$ ; <sup>c</sup>  $\Delta E_{\text{rest}} = \Delta E_{\text{orb}} - (\Delta E_{\sigma^{++}} + \Delta E_{\sigma^{+-}} + \Delta E_{\pi_{\perp}} + \Delta E_{\pi_{\parallel}})$ .

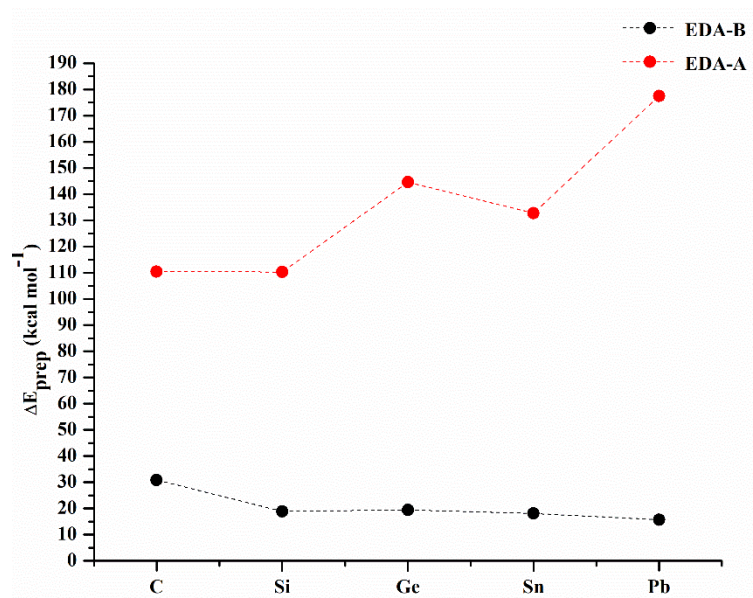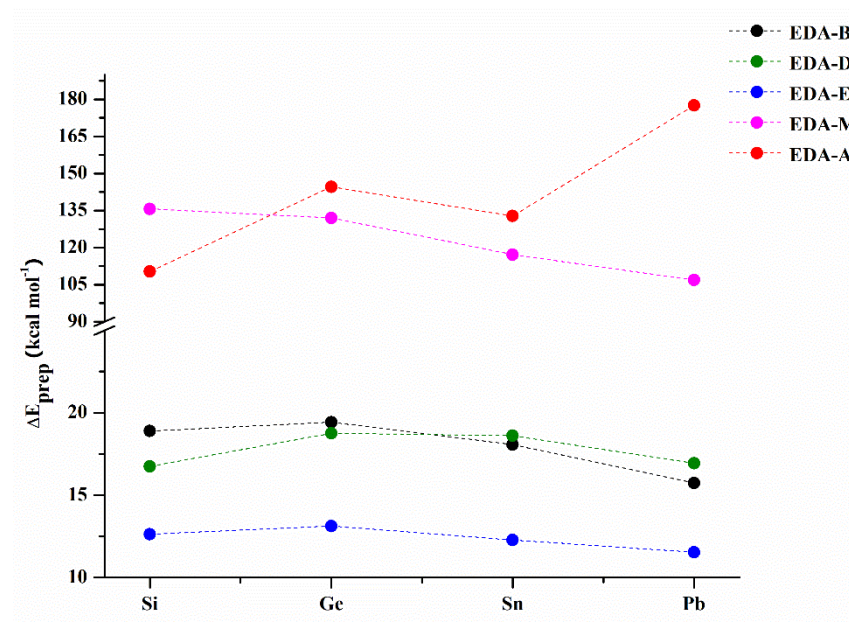

**Figure S6:** a) Plot of  $\Delta E_{\text{prep}}$  for bonding possibility A and B in compounds **2E** ( $E = \text{C-Pb}$ ) and b) a plot of  $\Delta E_{\text{prep}}$  for bonding possibility B, D, E, M and A in compounds **2E** ( $E = \text{Si-Pb}$ ) at BP86/TZ2Plevel of theory.

Note: Before looking into the detailed energy decomposition data for bonding possibilities D, E and M, we shall look at the trend in the  $\Delta E_{\text{prep}}$  for these bonding possibilities in **2E** (E = Si-Pb, Figure S6). Bonding possibility E has the lowest values of  $\Delta E_{\text{prep}}$  for all the compounds. Generalising, bonding possibilities where the central tetrel atom is present in its ground  $^3\text{P}$  state is found to have low values of  $\Delta E_{\text{prep}}$ , except in **2Sn** and **2Pb** where the preparatory energy for possibility D is higher than that for the dative possibility B. The preparatory energy associated with the charge separated bonding possibility C is high for **2Si** and **2Ge** and decreases, although only marginally, for **2Sn** and **2Pb**. Thus, the energy associated for preparing the fragments to the electronic state in bonding possibility C, where the tetrel atom is positively charged and the  $(\text{MnCp}(\text{CO})_2)_2$  fragments are negatively charged, is very demanding.

The detailed energy decomposition data for the bonding possibilities D and E is summarised in Table S3, and the plots of the deformation density with the associated NOCV orbitals are given in the Figure S8-Figure S11. The bonding possibility D and E, where the tetrel atom is present in its ground  $^3\text{P}$  state have low values of  $\Delta E_{\text{orb}}$  for **2Si-2Pb**. The magnitude of  $\Delta E_{\text{elect}}$  and  $\Delta E_{\text{orb}}$  decreases as the group-14 atom is changed from C to Pb for both bonding possibilities D and E. However, unlike bonding possibility B where the percentage contribution of  $\Delta E_{\text{elect}}$  and  $\Delta E_{\text{orb}}$  towards total  $\Delta E_{\text{orb}}$  increases and decreases respectively, here the percentage contribution of  $\Delta E_{\text{elect}}$  and  $\Delta E_{\text{orb}}$  remains comparable throughout the group. In both possibilities, the doubly occupied ns-orbital is involved in the donor-acceptor type  $\sigma_{++}$  interaction, while the singly occupied  $np_z$ -orbital is involved in an electron-sharing  $\sigma_{+-}$  interaction with the singly occupied anti-bonding combination of  $\sigma$ -group orbitals on the TM fragment. Similar to the dative possibility B, the energy associated with the former interaction contributes least to the overall  $\Delta E_{\text{orb}}$  and the magnitude decreases as the tetrel atom is changed from C ( $-29.40 \text{ kcal mol}^{-1}$  for D;  $-30.43 \text{ kcal mol}^{-1}$  for E) to Pb ( $-14.29 \text{ kcal mol}^{-1}$  for D;  $-14.07 \text{ kcal mol}^{-1}$  for E). The  $np_z$  orbital is still responsible for the maximum contribution to the overall orbital stabilisation, however, the magnitude of this stabilisation energy is lesser when the  $\sigma_{+-}$  interaction has an electron-sharing nature as compared to the dative nature in bonding possibility B. The bonding possibilities D and E differ in the nature of the  $\pi$ -skeleton, where the former features an electron-sharing  $\pi_{\parallel}$  bond ( $^3\text{P}; ns^2 np_z^1 np_x^1 np_y^0$ ) and latter features an electron-sharing  $\pi_{\perp}$  bond ( $^3\text{P}; ns^2 np_z^1 np_x^0 np_y^1$ ). The magnitude of stabilisation energy associated with these  $\pi$ -bonds are found to be higher when the  $\pi$ -interaction has an electron-sharing nature *viz.*  $\Delta E_{\pi_{\parallel}}$  and  $\Delta E_{\pi_{\perp}}$  in **2Si** for possibility D are  $-72.55 \text{ kcal mol}^{-1}$  and  $-45.71 \text{ kcal mol}^{-1}$  respectively, and the same for possibility E are  $-35.61 \text{ kcal mol}^{-1}$  and  $-65.61 \text{ kcal mol}^{-1}$  respectively. The heavier analogs show the same trend. Moreover, the energy associated with an electron-sharing  $\pi$ -interaction is higher in magnitude than the energy for the corresponding donor-acceptor  $\pi$ -interaction in bonding possibility B.

The bonding possibility C has comparable  $\Delta E_{\text{orb}}$  values for **2Sn** and **2Pb**, and the detailed energy decomposition data is summarised in Table S4. Note that the destabilisation associated with the Pauli's repulsion  $\Delta E_{\text{Pauli}}$  is notably low for bonding possibility C ( $176.68 \text{ kcal mol}^{-1}$  for **2Sn** and  $166.75 \text{ kcal mol}^{-1}$  for **2Pb**) in comparison to the same for bonding possibilities A, B, D and E for **2Sn** and **2Pb**. Also, the energy contribution from the electrostatic interaction (55.12% for **2Sn** and 56.37% for **2Pb**) is dominant over the orbital interaction for both compounds. This is in accordance with the charge-separated nature of the fragments involved. The plots of the deformation density and the associated NOCV orbitals are given in the Figure S13. Similar to the previously discussed bonding scenarios, the  $\sigma_{+-}$  interaction has the highest contribution towards  $\Delta E_{\text{orb}}$  *viz.*  $-75.44 \text{ kcal mol}^{-1}$  for **2Sn** (39.61%) and  $-74.77 \text{ kcal mol}^{-1}$  for **2Pb** (49.08%). The two  $\pi$ -type back-donations from the  $(\text{MnCp}(\text{CO})_2)_2$  group *viz.*  $\pi_{\perp}$  and  $\pi_{\parallel}$  contribute almost equally to the  $\Delta E_{\text{orb}}$ . The associated  $\Delta E_{\pi_{\perp}}$  and  $\Delta E_{\pi_{\parallel}}$  for **2Sn** are  $-38.82 \text{ kcal mol}^{-1}$  and  $35.39 \text{ kcal mol}^{-1}$ , while that for **2Pb** are  $35.87 \text{ kcal mol}^{-1}$  and  $29.37 \text{ kcal mol}^{-1}$  respectively.

The  $\sigma_{++}$  interaction contributes the least to the  $\Delta E_{\text{orb}}$ , consistent with the trend for the previously discussed possibilities.

a)

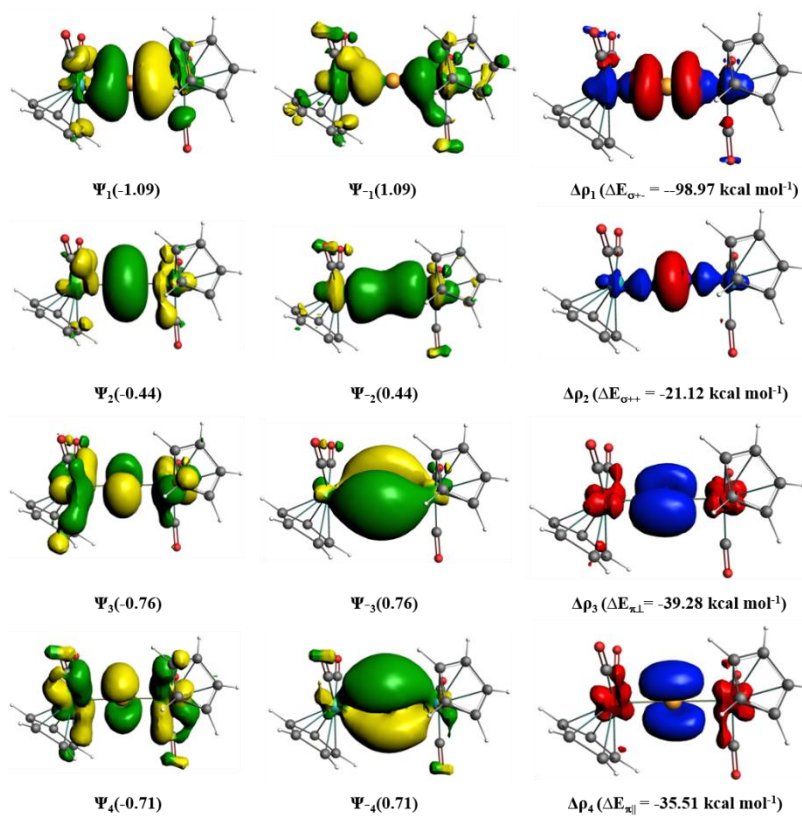

b)

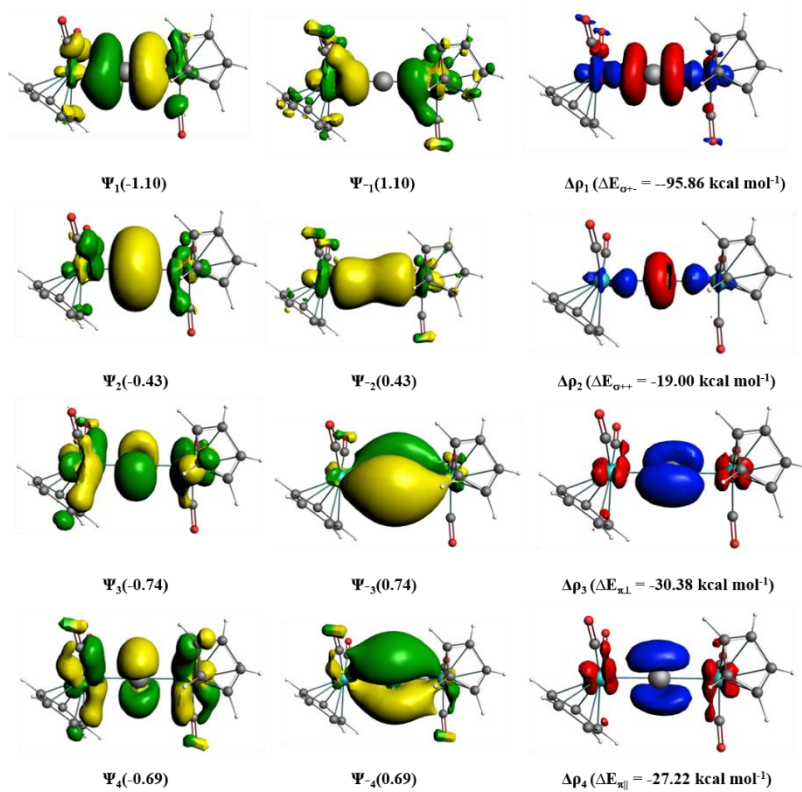

c)

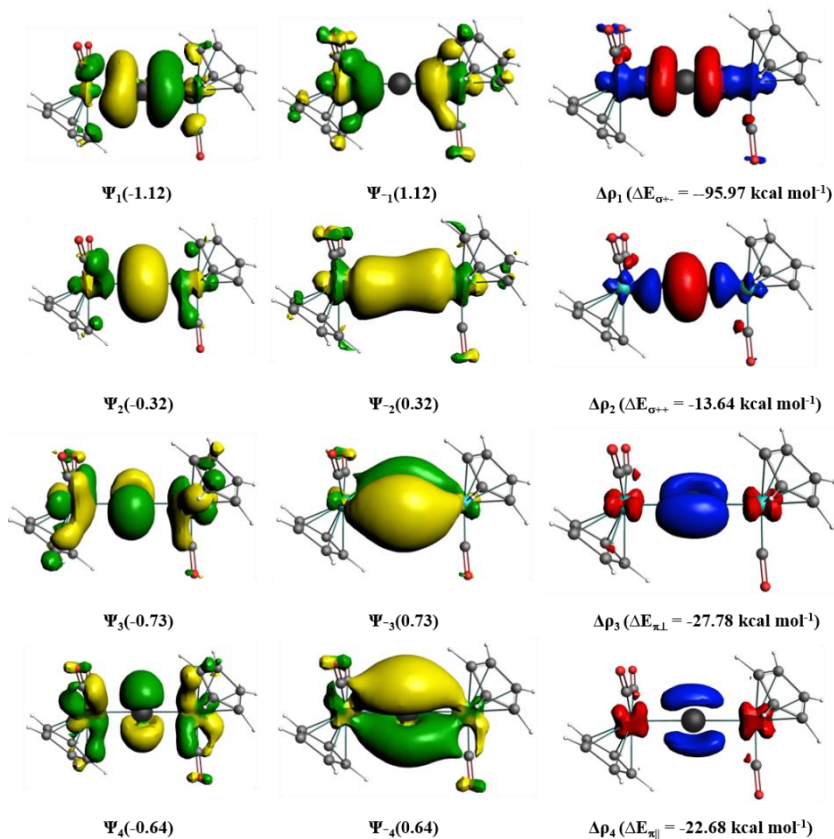

**Figure S7:** Plots of important NOCV pair of orbitals  $\Psi_{-n}/\Psi_n$  of dative bonding possibility B in **2Ge** (a), **2Sn** (b), **2Pb** (c) with their eigen values in parenthesis, the deformation densities  $\Delta\rho_n$  and the corresponding orbital stabilization energies  $\Delta E$  ( $\text{kcal mol}^{-1}$ ) at the BP86/TZ2P level of theory. The direction of the charge flow in the deformation density plot  $\Delta\rho_n$  is from red→blue. The isosurface values for NOCV orbitals and deformation densities are 0.03 and 0.003 respectively.

a)

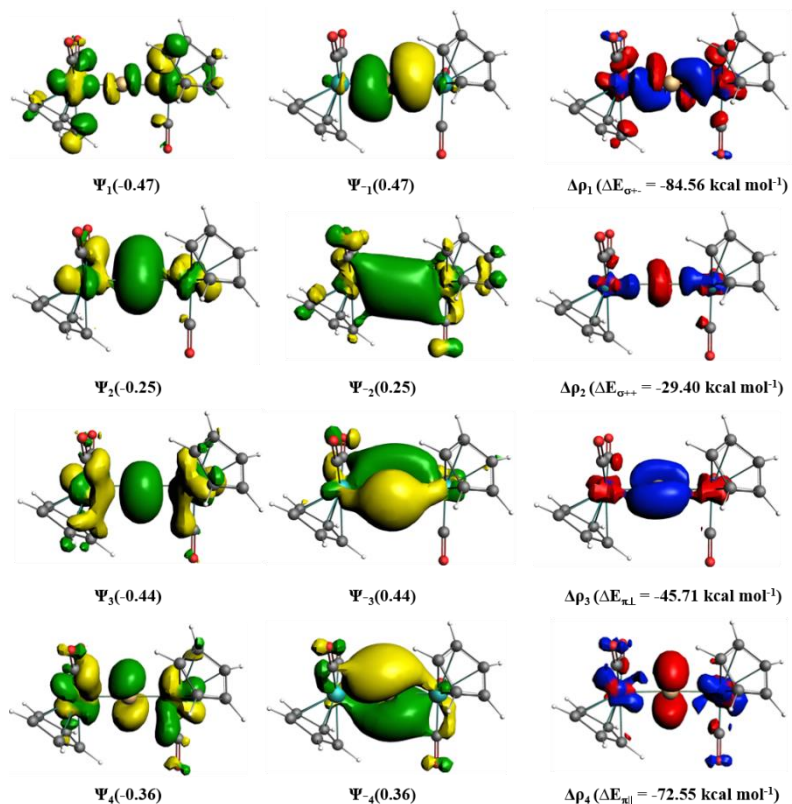

b)

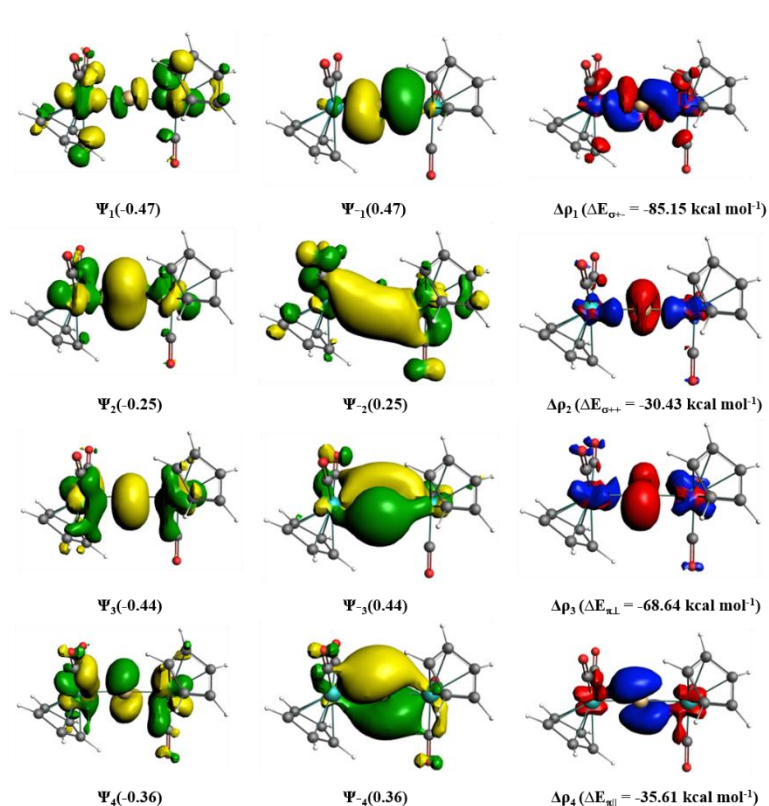

**Figure S8:** Plots of important alpha-NOCV pair of orbitals  $\Psi_{-n}/\Psi_n$  of bonding possibility D (a) and E (b) in **2Si** with their eigen values in parenthesis, the deformation densities  $\Delta\rho_n$  and the corresponding orbital stabilization energies  $\Delta E$  ( $\text{kcal mol}^{-1}$ ) at the BP86/TZ2P level of theory. The direction of the charge flow in the deformation density plot  $\Delta\rho_n$  is from red $\rightarrow$ blue. The isosurface values for NOCV orbitals and deformation densities are 0.03 and 0.003 respectively.

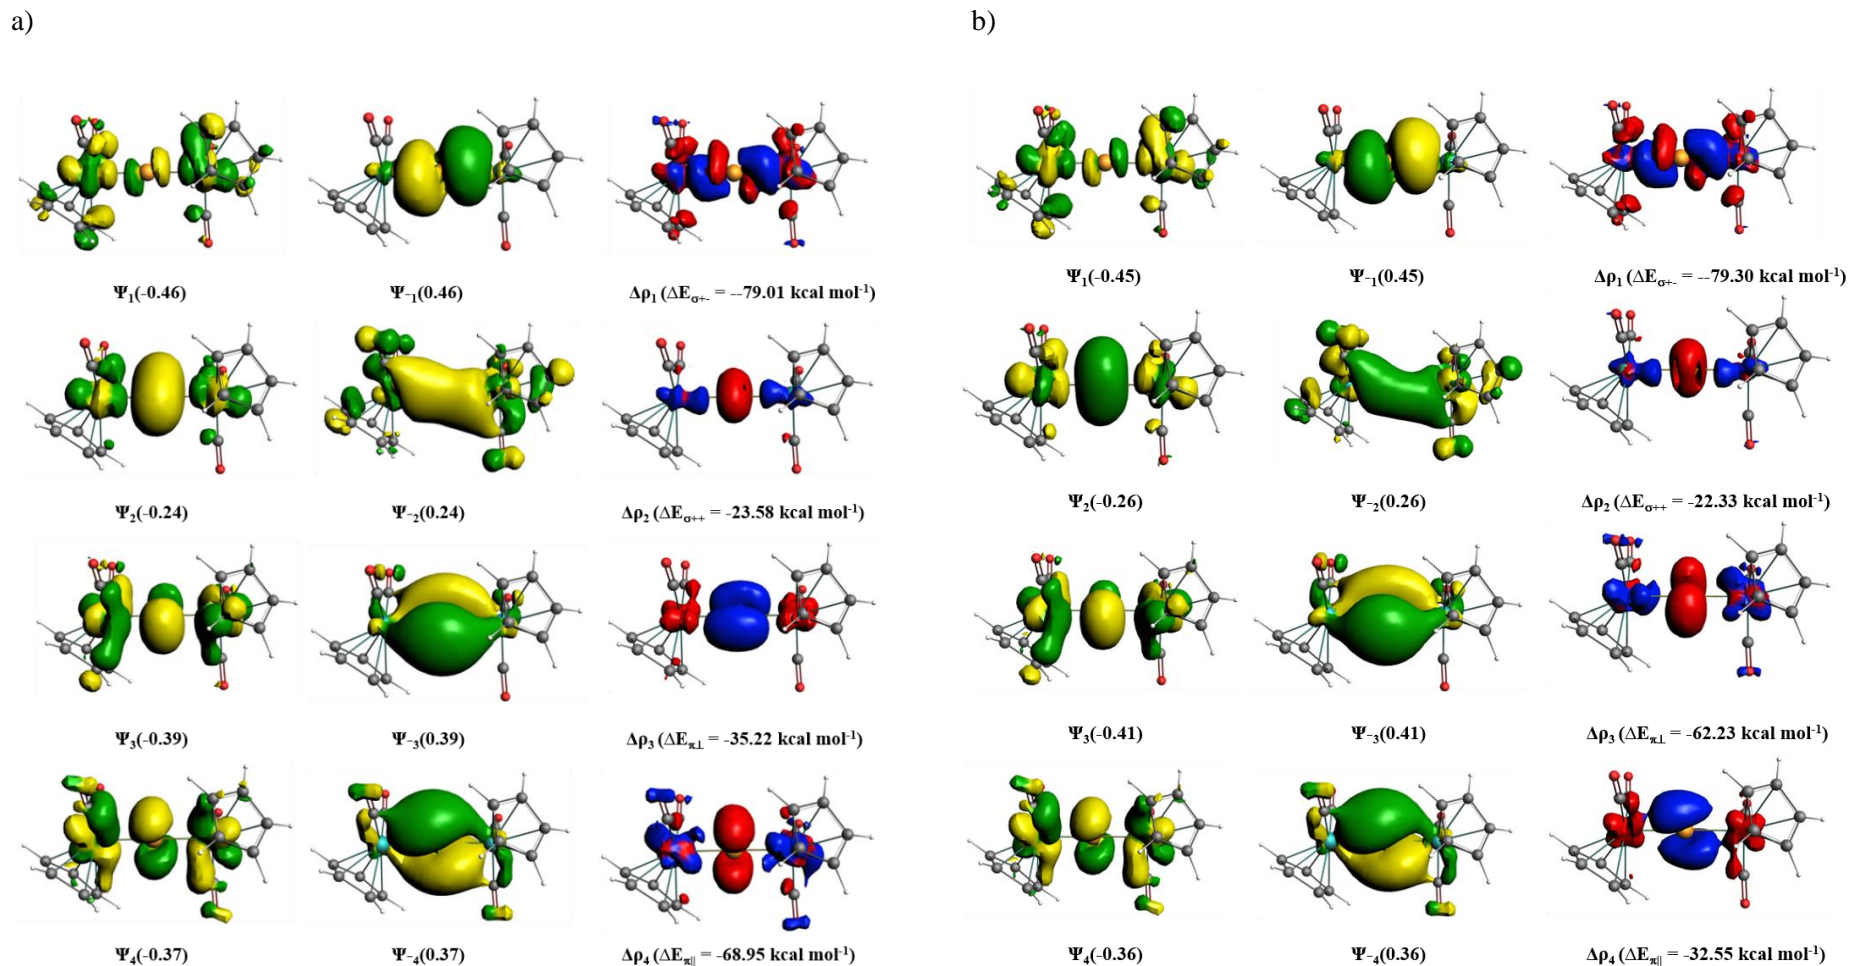

**Figure S9:** Plots of important alpha-NOCV pair of orbitals  $\Psi_{-n}/\Psi_n$  of bonding possibility D (a) and E (b) in **2Ge** with their eigen values in parenthesis, the deformation densities  $\Delta\rho_n$  and the corresponding orbital stabilization energies  $\Delta E$  ( $\text{kcal mol}^{-1}$ ) at the BP86/TZ2P level of theory. The direction of the charge flow in the deformation density plot  $\Delta\rho_n$  is from red→blue. The isosurface values for NOCV orbitals and deformation densities are 0.03 and 0.003 respectively.

a)

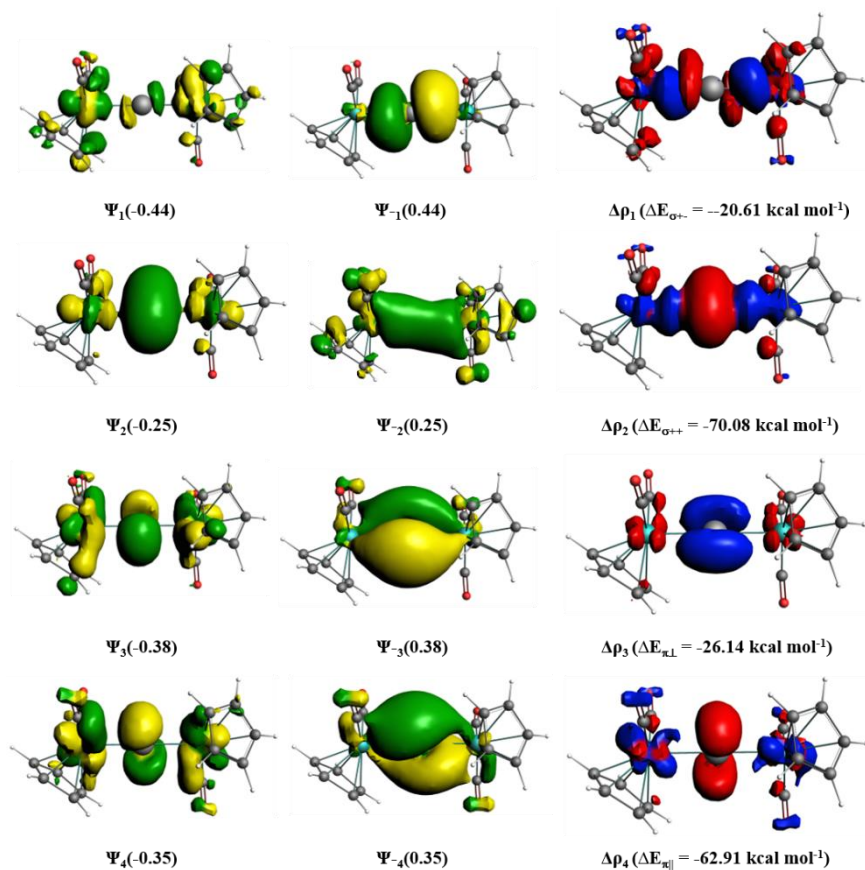

b)

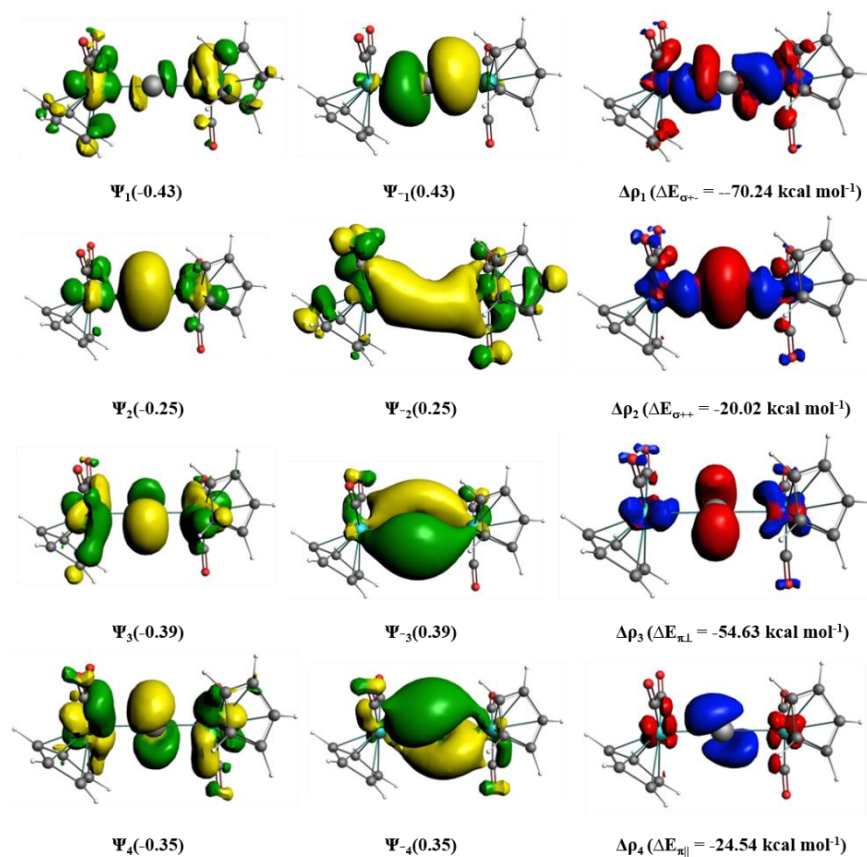

**Figure S10:** Plots of important alpha-NOCV pair of orbitals  $\Psi_{-n}/\Psi_n$  of bonding possibility D (a) and E (b) in **2Sn** with their eigen values in parenthesis, the deformation densities  $\Delta\rho_n$  and the corresponding orbital stabilization energies  $\Delta E$  ( $\text{kcal mol}^{-1}$ ) at the BP86/TZ2P level of theory. The direction of the charge flow in the deformation density plot  $\Delta\rho_n$  is from red→blue. The isosurface values for NOCV orbitals and deformation densities are 0.03 and 0.003 respectively.



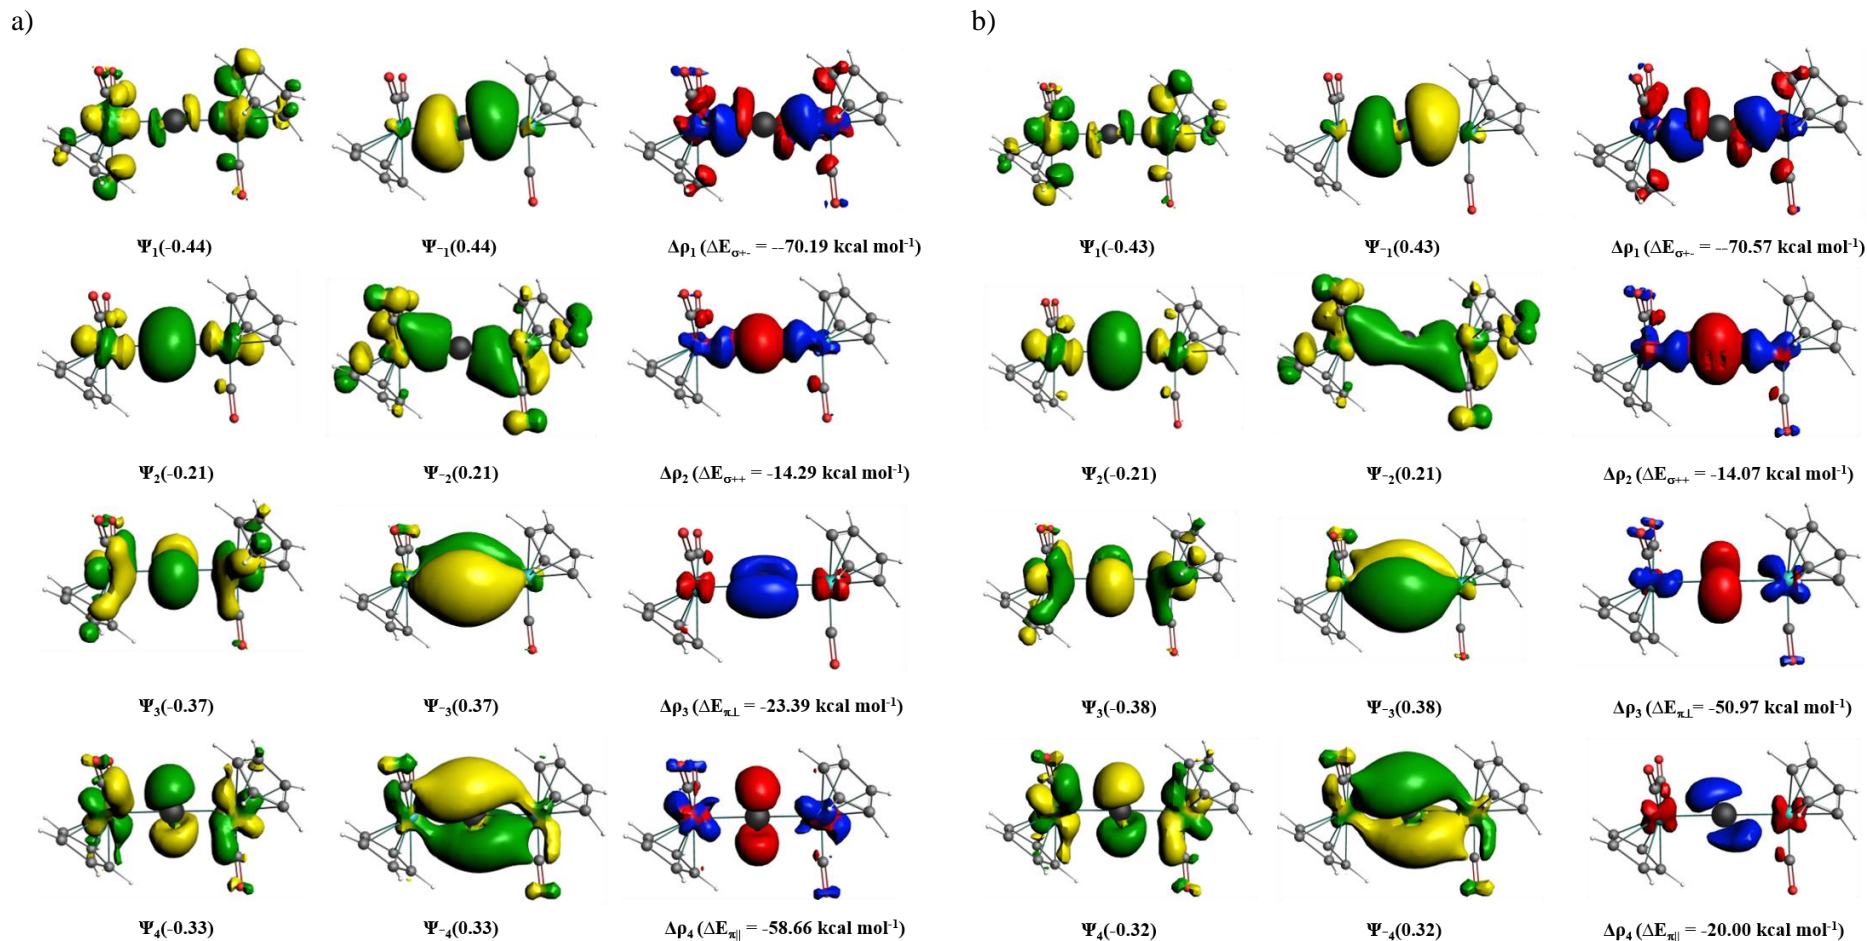

**Figure S11:** Plots of important alpha-NOCV pair of orbitals  $\Psi_n/\Psi_m$  of bonding possibility D (a) and E (b) in **2Pb** with their eigen values in parenthesis, the deformation densities  $\Delta\rho_n$  and the corresponding orbital stabilization energies  $\Delta E$  ( $\text{kcal mol}^{-1}$ ) at the BP86/TZ2P level of theory. The direction of the charge flow in the deformation density plot  $\Delta\rho_n$  is from red→blue. The isosurface values for NOCV orbitals and deformation densities are 0.03 and 0.003 respectively.

a)

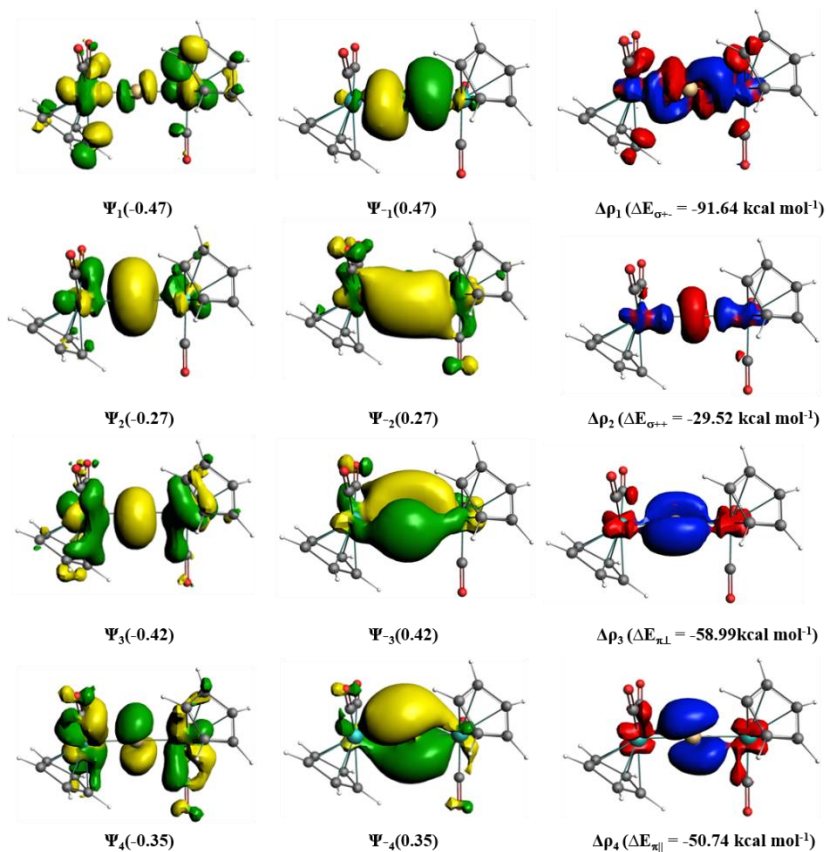

b)

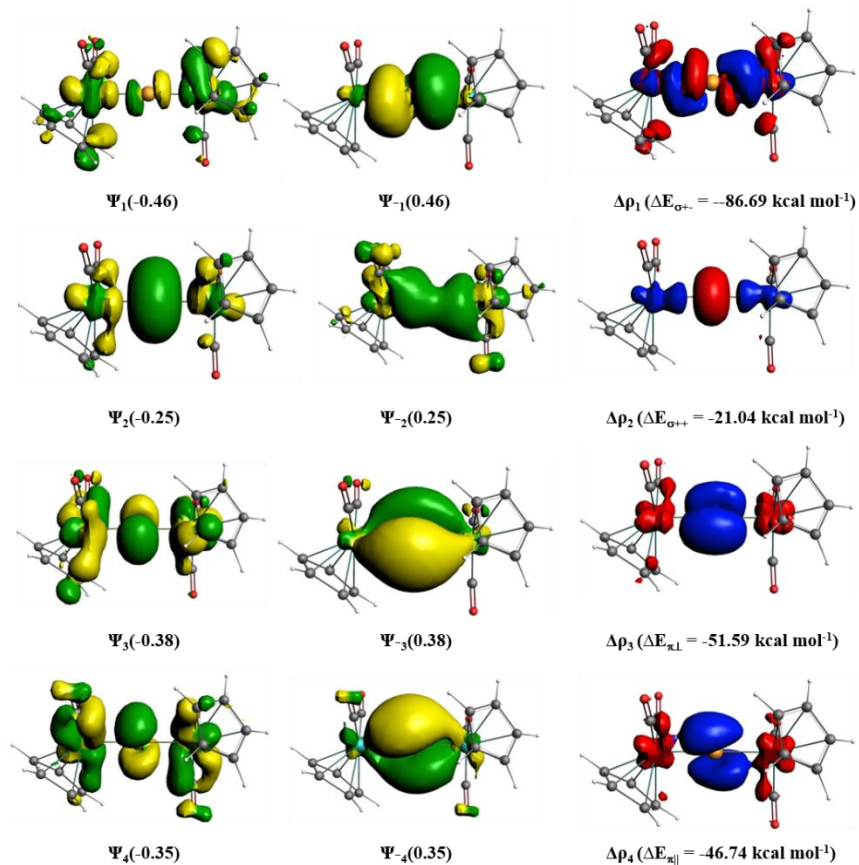

**Figure S12:** Plots of important alpha-NOCV pair of orbitals  $\Psi_{-n}/\Psi_n$  of bonding possibility C in **2Si** (a) and **2Ge** (b) with their eigen values in parenthesis, the deformation densities  $\Delta\rho_n$  and the corresponding orbital stabilization energies  $\Delta E$  ( $\text{kcal mol}^{-1}$ ) at the BP86/TZ2P level of theory. The direction of the charge flow in the deformation density plot  $\Delta\rho_n$  is from red→blue. The isosurface values for NOCV orbitals and deformation densities are 0.03 and 0.003 respectively.

a)

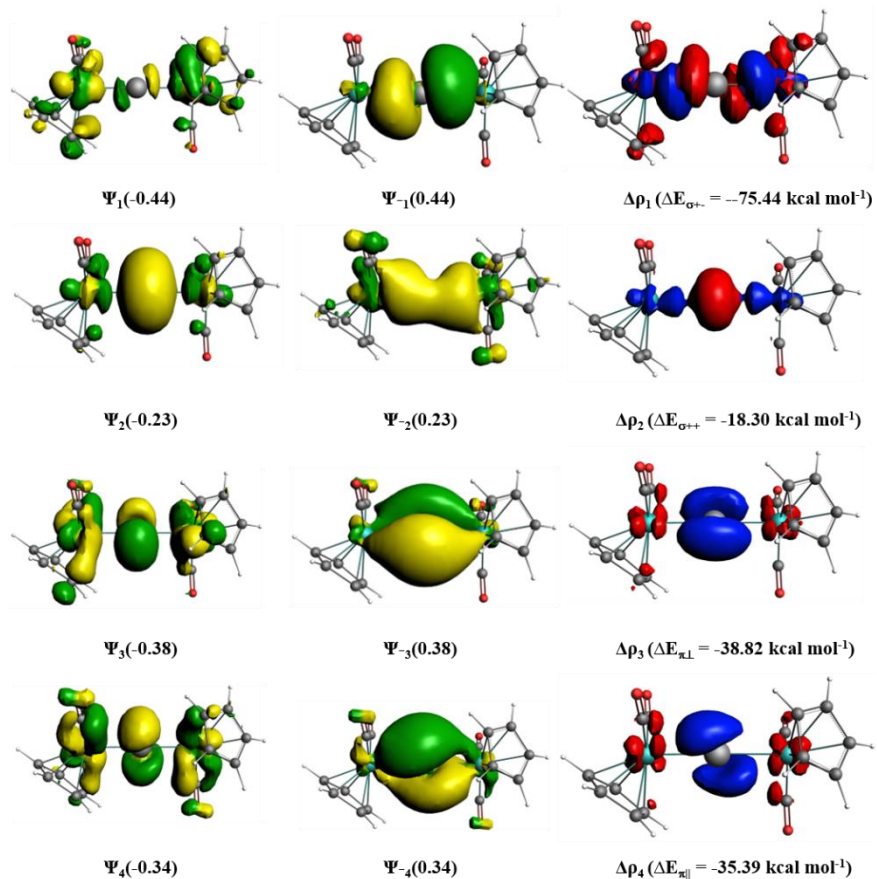

b)

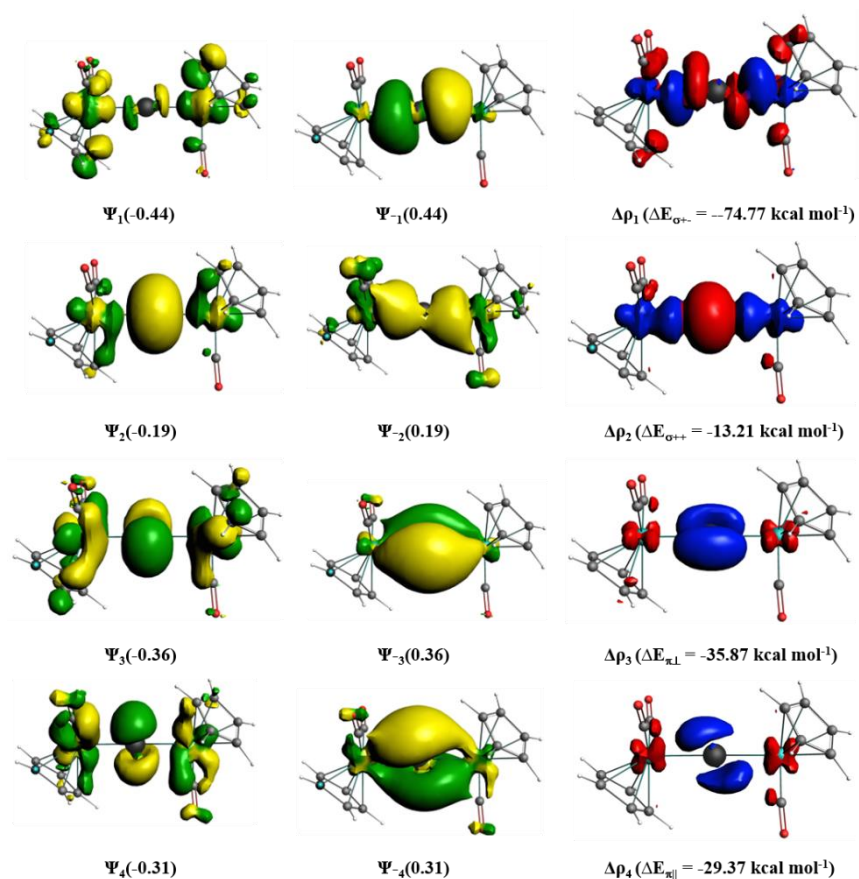

**Figure S13:** Plots of important alpha-NOCV pair of orbitals  $\Psi_{-n}/\Psi_n$  of bonding possibility C in **2Sn** (a) and **2Pb** (b) with their eigen values in parenthesis, the deformation densities  $\Delta\rho_n$  and the corresponding orbital stabilization energies  $\Delta E$  ( $\text{kcal mol}^{-1}$ ) at the BP86/TZ2P level of theory. The direction of the charge flow in the deformation density plot  $\Delta\rho_n$  is from red  $\rightarrow$  blue. The isosurface values for NOCV orbitals and deformation densities are 0.03 and 0.003 respectively

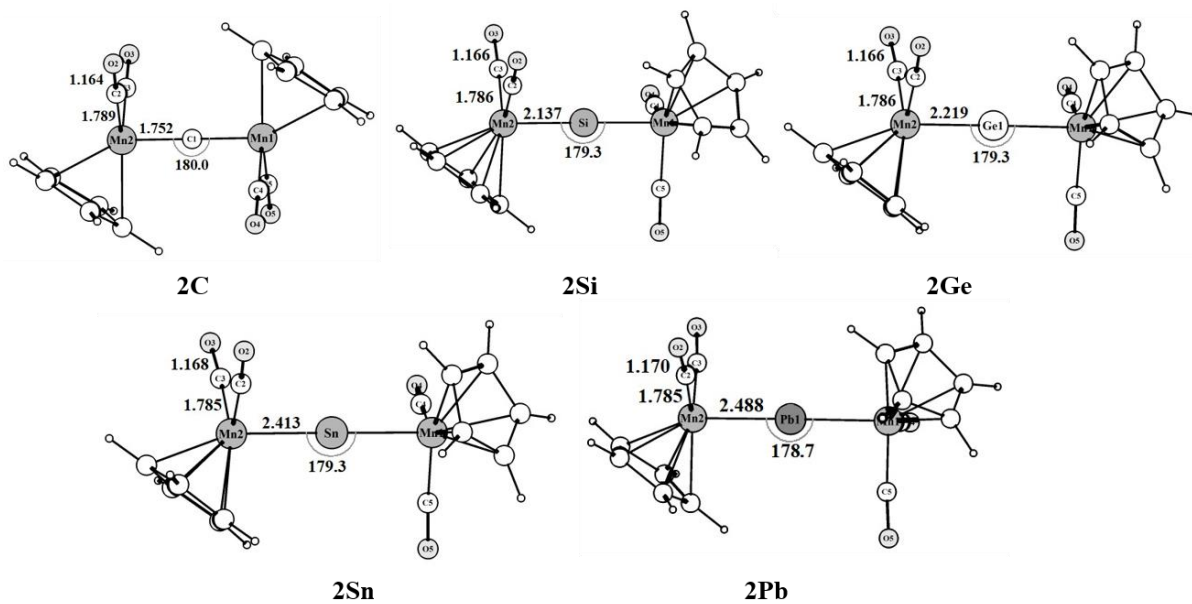

**Figure S14:** Optimised geometries of  $2E$  ( $E = C-Pb$ ) at the BP86/def2-TZVPP level of theory.

**Table S5:** Optimized Cartesian coordinates, total electronic energy  $E_{el}(\text{BP86})$ , zero-point energy, ZPE (BP86) at the BP86/def2-SVP level of theory and the total electronic energy,  $E_{el}(\text{M06})$  at the M06/def2-TZVPP level of theory using Gaussian09 program package. The energies are given in a.u.

|                                           |              |              |              |                                            |              |              |              |
|-------------------------------------------|--------------|--------------|--------------|--------------------------------------------|--------------|--------------|--------------|
| <b>1Si</b>                                |              |              |              | 6                                          | 0.000000000  | 0.756122000  | -0.783656000 |
| $E_{el}(\text{BP86}) = -870.6055952$ a.u. |              |              |              | 14                                         | 0.000000000  | 0.000000000  | 0.989692000  |
| ZPE (BP86) = 0.032048 a.u.                |              |              |              | 1                                          | 0.914081000  | 1.286909000  | -1.112954000 |
| $E_{el}(\text{M06}) = -870.7838461$ a.u.  |              |              |              | 1                                          | -0.914081000 | 1.286909000  | -1.112954000 |
| 14                                        | 0.010947000  | -0.508924000 | 1.291687000  | 6                                          | 0.000000000  | -0.756122000 | -0.783656000 |
| 14                                        | 0.010947000  | 1.363292000  | 0.000000000  | 1                                          | 0.914081000  | -1.286909000 | -1.112954000 |
| 1                                         | -0.981295000 | -0.593949000 | 2.427385000  | 1                                          | -0.914081000 | 1.286909000  | -1.112954000 |
| 1                                         | 0.751414000  | -1.824167000 | 1.249549000  | 6                                          | 0.000000000  | 0.756122000  | -0.783656000 |
| 14                                        | 0.010947000  | -0.508924000 | -1.291687000 | 1                                          | 0.914081000  | -1.286909000 | -1.112954000 |
| 1                                         | -0.981295000 | -0.593949000 | -2.427385000 | 1                                          | -0.914081000 | 1.286909000  | -1.112954000 |
| 1                                         | 0.751414000  | -1.824167000 | -1.249549000 | <b>1GeCH<sub>2</sub></b>                   |              |              |              |
| <b>1Ge</b>                                |              |              |              | $E_{el}(\text{BP86}) = -2155.5076668$ a.u. |              |              |              |
| $E_{el}(\text{BP86}) = -6233.404849$ a.u. |              |              |              | ZPE (BP86) = 0.049256 a.u.                 |              |              |              |
| ZPE (BP86) = 0.028845 a.u.                |              |              |              | $E_{el}(\text{M06}) = -2155.4802745$ a.u.  |              |              |              |
| $E_{el}(\text{M06}) = -6233.2437827$ a.u. |              |              |              | 6                                          | 0.000000000  | 0.749390000  | -1.237751000 |
| 32                                        | 0.009045000  | -0.593966000 | 1.400955000  | 32                                         | 0.000000000  | 0.000000000  | 0.657432000  |
| 32                                        | 0.009045000  | 1.357172000  | 0.000000000  | 1                                          | 0.917209000  | 1.285041000  | -1.546203000 |
| 1                                         | -1.070989000 | -0.688286000 | 2.531423000  | 1                                          | -0.917209000 | 1.285041000  | -1.546203000 |
| 1                                         | 0.636824000  | -2.019559000 | 1.267615000  | 6                                          | 0.000000000  | -0.749390000 | -1.237751000 |
| 32                                        | 0.009045000  | -0.593966000 | -1.400955000 | 1                                          | -0.917209000 | -1.285041000 | -1.546203000 |
| 1                                         | 0.636824000  | -2.019559000 | -1.267615000 | 1                                          | 0.917209000  | -1.285041000 | -1.546203000 |
| 1                                         | -1.070989000 | -0.688286000 | -2.531423000 | <b>1SnCH<sub>2</sub></b>                   |              |              |              |
| <b>1Sn</b>                                |              |              |              | $E_{el}(\text{BP86}) = -292.9250352$ a.u.  |              |              |              |
| $E_{el}(\text{BP86}) = -645.6417469$ a.u. |              |              |              | ZPE (BP86) = 0.049000 a.u.                 |              |              |              |
| ZPE (BP86) = 0.024182 a.u.                |              |              |              | $E_{el}(\text{M06}) = -292.9181568$ a.u.   |              |              |              |
| $E_{el}(\text{M06}) = -645.5446876$ a.u.  |              |              |              | 6                                          | 0.000000000  | 0.740755000  | -1.618676000 |
| 50                                        | -0.007677000 | -0.711542000 | 1.621974000  | 50                                         | 0.000000000  | 0.000000000  | 0.541116000  |
| 50                                        | -0.007677000 | 1.551478000  | 0.000000000  | 1                                          | -0.920265000 | 1.279832000  | -1.907923000 |
| 1                                         | 1.178905000  | -0.873302000 | 2.901131000  | 1                                          | 0.920265000  | 1.279832000  | -1.907923000 |
| 1                                         | -0.603126000 | -2.336545000 | 1.383344000  | 6                                          | 0.000000000  | -0.740755000 | -1.618676000 |
| 50                                        | -0.007677000 | -0.711542000 | -1.621974000 | 1                                          | 0.920265000  | -1.279832000 | -1.907923000 |
| 1                                         | -0.603126000 | -2.336545000 | -1.383344000 | 1                                          | -0.920265000 | -1.279832000 | -1.907923000 |
| 1                                         | 1.178905000  | -0.873302000 | -2.901131000 | <b>1PbCH<sub>2</sub></b>                   |              |              |              |
| <b>1Pb</b>                                |              |              |              | $E_{el}(\text{BP86}) = -271.5299077$ a.u.  |              |              |              |
| $E_{el}(\text{BP86}) = -581.4307656$ a.u. |              |              |              | ZPE (BP86) = 0.049033 a.u.                 |              |              |              |
| ZPE (BP86) = 0.021553 a.u.                |              |              |              | $E_{el}(\text{M06}) = -271.4401638$ a.u.   |              |              |              |
| $E_{el}(\text{M06}) = -581.083086$ a.u.   |              |              |              | 6                                          | 0.000000000  | 0.732352000  | -1.910029000 |
| 82                                        | 0.006681000  | -0.751391000 | 1.752838000  | 82                                         | 0.000000000  | 0.000000000  | 0.385338000  |
| 82                                        | 0.006681000  | 1.586836000  | 0.000000000  | 1                                          | -0.923497000 | 1.279174000  | -2.169351000 |
| 1                                         | 0.454460000  | -2.470467000 | 1.359059000  | 1                                          | 0.923497000  | 1.279174000  | -2.169351000 |
| 1                                         | -1.276251000 | -0.975755000 | 3.033787000  | 6                                          | 0.000000000  | -0.732352000 | -1.910029000 |
| 82                                        | 0.006681000  | -0.751391000 | -1.752838000 | 1                                          | -0.923497000 | -1.279174000 | -2.169351000 |
| 1                                         | 0.454460000  | -2.470467000 | -1.359059000 | 1                                          | 0.923497000  | -1.279174000 | -2.169351000 |
| 1                                         | -1.276251000 | -0.975755000 | -3.033787000 | <b>2Si</b>                                 |              |              |              |
| <b>1SiCH<sub>2</sub></b>                  |              |              |              | $E_{el}(\text{BP86}) = -3431.5127257$ a.u. |              |              |              |
| $E_{el}(\text{BP86}) = -367.9040865$ a.u. |              |              |              | ZPE (BP86) = 0.202501 a.u.                 |              |              |              |
| ZPE (BP86) = 0.049448 a.u.                |              |              |              | $E_{el}(\text{M06}) = -3431.6948203$ a.u.  |              |              |              |
| $E_{el}(\text{M06}) = -367.991526$ a.u.   |              |              |              | 14                                         | 0.000000000  | 0.000000000  | 0.084299000  |
| 25                                        | 0.000000000  | 0.000000000  | 0.084299000  | 25                                         | 0.000000000  | 2.128369000  | 0.029556000  |
| 25                                        | 0.000000000  | -2.128369000 | 0.029556000  | 25                                         | 0.000000000  | -2.128369000 | 0.029556000  |
| 6                                         | -1.639931000 | 2.068123000  | -0.657954000 | 6                                          | -1.639931000 | 2.068123000  | -0.657954000 |
| 8                                         | -2.711412000 | 2.055955000  | -1.136378000 | 8                                          | -2.711412000 | 2.055955000  | -1.136378000 |

|   |              |              |              |
|---|--------------|--------------|--------------|
| 6 | -0.603657000 | 2.194955000  | 1.705227000  |
| 8 | -0.979689000 | 2.289746000  | 2.809827000  |
| 6 | 0.603657000  | -2.194955000 | 1.705227000  |
| 8 | 0.979689000  | -2.289746000 | 2.809827000  |
| 6 | 1.639931000  | -2.068123000 | -0.657954000 |
| 8 | 2.711412000  | -2.055955000 | -1.136378000 |
| 6 | 1.103665000  | 3.969714000  | 0.248944000  |
| 6 | 0.528916000  | 3.916445000  | -1.057798000 |
| 6 | 1.068465000  | 2.768078000  | -1.737113000 |
| 6 | 1.975486000  | 2.109046000  | -0.839777000 |
| 6 | 2.001821000  | 2.853437000  | 0.388573000  |
| 1 | 0.896757000  | 4.727980000  | 1.014580000  |
| 1 | -0.196696000 | 4.627144000  | -1.472950000 |
| 1 | 0.831670000  | 2.454314000  | -2.761305000 |
| 1 | 2.587724000  | 1.227896000  | -1.073360000 |
| 6 | -1.068465000 | -2.768078000 | -1.737113000 |
| 6 | -1.975486000 | -2.109046000 | -0.839777000 |
| 6 | -2.001821000 | -2.853437000 | 0.388573000  |
| 6 | -1.103665000 | -3.969714000 | 0.248944000  |
| 6 | -0.528916000 | -3.916445000 | -1.057798000 |
| 1 | -0.831670000 | -2.454314000 | -2.761305000 |
| 1 | -2.587724000 | -1.227896000 | -1.073360000 |
| 1 | -2.600967000 | -2.614389000 | 1.275839000  |
| 1 | -0.896757000 | -4.727980000 | 1.014580000  |
| 1 | 2.600967000  | 2.614389000  | 1.275839000  |
| 1 | 0.196696000  | -4.627144000 | -1.472950000 |

**2Ge**

$E_{el}(BP86) = -5219.1156771$  a.u.

$ZPE(BP86) = 0.201475$  a.u.

$E_{el}(M06) = -5219.1847345$  a.u.

|    |              |              |              |
|----|--------------|--------------|--------------|
| 32 | 0.000000000  | 0.000000000  | 0.055479000  |
| 25 | 0.000000000  | 2.206288000  | 0.022708000  |
| 25 | 0.000000000  | -2.206288000 | 0.022708000  |
| 6  | -1.717642000 | 2.211459000  | -0.451662000 |
| 8  | -2.839385000 | 2.268805000  | -0.787959000 |
| 6  | -0.405390000 | 2.272764000  | 1.757190000  |
| 8  | -0.650052000 | 2.380843000  | 2.897053000  |
| 6  | 0.405390000  | -2.272764000 | 1.757190000  |
| 8  | 0.650052000  | -2.380843000 | 2.897053000  |
| 6  | 1.717642000  | -2.211459000 | -0.451662000 |
| 8  | 2.839385000  | -2.268805000 | -0.787959000 |
| 6  | 0.769154000  | 4.200411000  | -0.219857000 |
| 6  | 0.417382000  | 3.663855000  | -1.501227000 |
| 6  | 1.223756000  | 2.502873000  | -1.747754000 |
| 6  | 2.073506000  | 2.308477000  | -0.602388000 |
| 6  | 1.789103000  | 3.352015000  | 0.338298000  |
| 1  | 0.340513000  | 5.093823000  | 0.249957000  |
| 1  | -0.335956000 | 4.076789000  | -2.184407000 |
| 1  | 1.209085000  | 1.886709000  | -2.655298000 |
| 1  | 2.834993000  | 1.526129000  | -0.488359000 |
| 6  | -1.223756000 | -2.502873000 | -1.747754000 |
| 6  | -2.073506000 | -2.308477000 | -0.602388000 |
| 6  | -1.789103000 | -3.352015000 | 0.338298000  |
| 6  | -0.769154000 | -4.200411000 | -0.219857000 |
| 6  | -0.417382000 | -3.663855000 | -1.501227000 |
| 1  | -1.209085000 | -1.886709000 | -2.655298000 |
| 1  | -2.834993000 | -1.526129000 | -0.488359000 |
| 1  | -2.272807000 | -3.485123000 | 1.314380000  |
| 1  | -0.340513000 | -5.093823000 | 0.249957000  |
| 1  | 2.272807000  | 3.485123000  | 1.314380000  |

|   |             |              |              |
|---|-------------|--------------|--------------|
| 1 | 0.335956000 | -4.076789000 | -2.184407000 |
|---|-------------|--------------|--------------|

**2Sn**

$E_{el}(BP86) = -3356.5245022$  a.u.

$ZPE(BP86) = 0.200860$  a.u.

$E_{el}(M06) = -3356.6148251$  a.u.

|    |              |              |              |
|----|--------------|--------------|--------------|
| 50 | 0.000000000  | 0.000000000  | 0.032205000  |
| 25 | 0.000000000  | 2.404271000  | 0.016062000  |
| 25 | 0.000000000  | -2.404271000 | 0.016062000  |
| 6  | -1.736622000 | 2.421147000  | -0.381143000 |
| 8  | -2.871987000 | 2.510110000  | -0.664045000 |
| 6  | -0.339219000 | 2.451105000  | 1.764706000  |
| 8  | -0.543969000 | 2.563428000  | 2.913378000  |
| 6  | 0.339219000  | -2.451105000 | 1.764706000  |
| 8  | 0.543969000  | -2.563428000 | 2.913378000  |
| 6  | 1.736622000  | -2.421147000 | -0.381143000 |
| 8  | 2.871987000  | -2.510110000 | -0.664045000 |
| 6  | 0.679760000  | 4.412850000  | -0.277788000 |
| 6  | 0.348035000  | 3.829335000  | -1.545770000 |
| 6  | 1.205692000  | 2.701327000  | -1.768627000 |
| 6  | 2.069841000  | 2.574971000  | -0.623689000 |
| 6  | 1.740983000  | 3.626793000  | 0.292706000  |
| 1  | 0.213752000  | 5.297921000  | 0.171692000  |
| 1  | -0.425322000 | 4.191486000  | -2.235399000 |
| 1  | 1.222201000  | 2.071522000  | -2.666898000 |
| 1  | 2.873525000  | 1.838673000  | -0.495627000 |
| 6  | -1.205692000 | -2.701327000 | -1.768627000 |
| 6  | -2.069841000 | -2.574971000 | -0.623689000 |
| 6  | -1.740983000 | -3.626793000 | 0.292706000  |
| 6  | -0.679760000 | -4.412850000 | -0.277788000 |
| 6  | -0.348035000 | -3.829335000 | -1.545770000 |
| 1  | -1.222201000 | -2.071522000 | -2.666898000 |
| 1  | -2.873525000 | -1.838673000 | -0.495627000 |
| 1  | -2.222698000 | -3.805537000 | 1.262529000  |
| 1  | -0.213752000 | -5.297921000 | 0.171692000  |
| 1  | 2.222698000  | 3.805537000  | 1.262529000  |
| 1  | 0.425322000  | -4.191486000 | -2.235399000 |

**2Pb**

$E_{el}(BP86) = -3335.1232101$  a.u.

$ZPE(BP86) = 0.200400$  a.u.

$E_{el}(M06) = -3335.1311544$  a.u.

|    |              |              |              |
|----|--------------|--------------|--------------|
| 82 | 0.000000000  | 0.000000000  | 0.030478000  |
| 25 | 0.000000000  | 2.482555000  | 0.007005000  |
| 25 | 0.000000000  | -2.482555000 | 0.007005000  |
| 6  | -1.581209000 | 2.497092000  | -0.814031000 |
| 8  | -2.609852000 | 2.594396000  | -1.371664000 |
| 6  | -0.756089000 | 2.548803000  | 1.618382000  |
| 8  | -1.236365000 | 2.681529000  | 2.680472000  |
| 6  | 0.756089000  | -2.548803000 | 1.618382000  |
| 8  | 1.236365000  | -2.681529000 | 2.680472000  |
| 6  | 1.581209000  | -2.497092000 | -0.814031000 |
| 8  | 2.609852000  | -2.594396000 | -1.371664000 |
| 6  | 0.914920000  | 4.400711000  | 0.229417000  |
| 6  | 0.600896000  | 4.179080000  | -1.148437000 |
| 6  | 1.345777000  | 3.036361000  | -1.605676000 |
| 6  | 2.115362000  | 2.545656000  | -0.496122000 |
| 6  | 1.854844000  | 3.386286000  | 0.635612000  |
| 1  | 0.519012000  | 5.204733000  | 0.862016000  |

|   |              |              |              |
|---|--------------|--------------|--------------|
| 1 | -0.082532000 | 4.784771000  | -1.757092000 |
| 1 | 1.339411000  | 2.626635000  | -2.623213000 |
| 1 | 2.830522000  | 1.712883000  | -0.525872000 |
| 6 | -2.115362000 | -2.545656000 | -0.496122000 |
| 6 | -1.854844000 | -3.386286000 | 0.635612000  |
| 6 | -0.914920000 | -4.400711000 | 0.229417000  |
| 6 | -0.600896000 | -4.179080000 | -1.148437000 |
| 6 | -1.345777000 | -3.036361000 | -1.605676000 |
| 1 | -2.830522000 | -1.712883000 | -0.525872000 |
| 1 | -2.296821000 | -3.279041000 | 1.634089000  |
| 1 | -0.519012000 | -5.204733000 | 0.862016000  |
| 1 | 0.082532000  | -4.784771000 | -1.757092000 |
| 1 | 2.296821000  | 3.279041000  | 1.634089000  |
| 1 | -1.339411000 | -2.626635000 | -2.623213000 |
